# Supplementary material
Source: publisher figshare collection journal article supplement (https://sage.figshare.com/ndownloader/files/24074389)
Supplement: Supplementary file 1 [file 24074389]

## Supplemental Online Material for “Mothers’ Work Schedule Inflexibility and Children’s Behavior Problems”

Table A1. *Predicting maternal parenting stress and depressive symptoms from work schedule inflexibility at the 5-year wave*

| Variable (reference group)                               | B     |      | (SE)   |
|----------------------------------------------------------|-------|------|--------|
| <b>Parenting stress</b>                                  |       |      |        |
| Mother's work schedule inflexibility (Low inflexibility) |       |      |        |
| Moderate inflexibility                                   | 0.20  | ***a | (0.06) |
| High inflexibility                                       | 0.45  | ***  | (0.07) |
| Constant                                                 | -1.18 | +    | (0.69) |
| R <sup>2</sup>                                           | 0.13  |      |        |
| <b>Depressive symptoms</b>                               |       |      |        |
| Mother's work schedule inflexibility (Low inflexibility) |       |      |        |
| Moderate inflexibility                                   | 0.06  | a    | (0.05) |
| High inflexibility                                       | 0.27  | **   | (0.08) |
| Constant                                                 | -0.74 |      | (0.73) |
| R <sup>2</sup>                                           | 0.10  |      |        |

Notes:  $N=1451$ . Models include all control variables listed in Table 1, other maternal employment characteristics, and externalizing behaviors at the 3-year wave. a indicates coefficient differs from "High inflexibility" at  $p<.05$ .

\*\*\* $p<.001$ ; \*\* $p<.01$ ; \* $p<.05$ ; ^ $p<.10$

Table A2. *Results from interaction models*

| Model                                                                        | Externalizing<br>Behaviors |   | Internalizing<br>Behaviors |   |
|------------------------------------------------------------------------------|----------------------------|---|----------------------------|---|
| Variable (reference group)                                                   | 2                          |   | 2                          |   |
|                                                                              | B (SE)                     |   | B (SE)                     |   |
| <u>Panel A: Interaction with Family Structure</u>                            |                            |   |                            |   |
| Work schedule inflexibility (Low inflexibility)                              |                            |   |                            |   |
| Moderate inflexibility                                                       | 0.15<br>(0.06)             | * | -0.01<br>(0.06)            |   |
| High inflexibility                                                           | 0.09<br>(0.08)             |   | 0.23<br>(0.10)             | * |
| Single-mother family                                                         | 0.16<br>(0.07)             | * | -0.03<br>(0.08)            |   |
| Work schedule inflexibility x Family structure (Low inflexibility x Single)  |                            |   |                            |   |
| Moderate inflexibility x Single                                              | -0.21<br>(0.10)            | * | 0.07<br>(0.10)             |   |
| High inflexibility x Single                                                  | 0.15<br>(0.13)             |   | -0.04<br>(0.14)            |   |
| <u>Panel B: Interaction with Family Income</u>                               |                            |   |                            |   |
| Work schedule inflexibility (Low inflexibility)                              |                            |   |                            |   |
| Moderate inflexibility                                                       | 0.03<br>(0.07)             |   | -0.04<br>(0.07)            |   |
| High inflexibility                                                           | 0.01<br>(0.09)             |   | 0.15<br>(0.11)             |   |
| Low-income family                                                            | -0.07<br>(0.08)            |   | -0.12<br>(0.08)            |   |
| Work schedule inflexibility x Family income (Low inflexibility x Low-income) |                            |   |                            |   |
| Moderate inflexibility x Low-income                                          | 0.05<br>(0.09)             |   | 0.11<br>(0.10)             |   |
| High inflexibility x Low-income                                              | 0.26<br>(0.13)             | * | 0.11<br>(0.14)             |   |

Notes: N=1451. Coefficients are shown with robust standard errors in parentheses. Models include all control variables listed in Table 1, other maternal employment characteristics, and a lagged dependent variable. Outcome variables were standardized. Results are unweighted. \*\*\* $p < .001$ ; \*\* $p < .01$ ; \* $p < .05$ ; + $p < .10$

Table A3. *Sensitivity analyses including not employed mothers*

| Model                                           | Externalizing Behaviors |                   |                  | Internalizing Behaviors |                    |                   |
|-------------------------------------------------|-------------------------|-------------------|------------------|-------------------------|--------------------|-------------------|
|                                                 | 1                       | 2                 | 3                | 1                       | 2                  | 3                 |
| Variable (reference group)                      | B (SE)                  | B (SE)            | B (SE)           | B (SE)                  | B (SE)             | B (SE)            |
| Work schedule inflexibility (Low inflexibility) |                         |                   |                  |                         |                    |                   |
| Not employed                                    | 0.04<br>(0.05)          | a 0.08<br>(0.07)  | 0.01<br>(0.07)   | 0.09<br>(0.05)          | a 0.15<br>(0.08)   | + 0.07<br>(0.08)  |
| Moderate inflexibility                          | 0.06<br>(0.05)          | a+ 0.06<br>(0.04) | 0.03<br>(0.04)   | 0.04<br>(0.05)          | a 0.03<br>(0.05)   | a 0.01<br>(0.05)  |
| High inflexibility                              | 0.17<br>(0.06)          | ** 0.15<br>(0.06) | * 0.08<br>(0.06) | 0.25<br>(0.07)          | *** 0.22<br>(0.07) | ** 0.14<br>(0.07) |
| Work hours (Full-time)                          |                         |                   |                  |                         |                    |                   |
| Part-time                                       |                         | -0.08<br>(0.05)   | -0.10<br>(0.05)  |                         | -0.03<br>(0.06)    | -0.05<br>(0.06)   |
| 41+ hours                                       |                         | 0.05<br>(0.06)    | 0.03<br>(0.06)   |                         | 0.07<br>(0.06)     | 0.05<br>(0.06)    |
| Work schedule (Standard hours only)             |                         |                   |                  |                         |                    |                   |
| Worked evenings                                 |                         | -0.04<br>(0.06)   | -0.03<br>(0.05)  |                         | -0.03<br>(0.06)    | -0.02<br>(0.06)   |
| Worked nights                                   |                         | 0.12<br>(0.07)    | 0.11<br>(0.07)   |                         | 0.21<br>(0.08)     | ** 0.20<br>(0.08) |
| Worked weekends                                 |                         | -0.03<br>(0.05)   | -0.01<br>(0.05)  |                         | -0.00<br>(0.05)    | 0.02<br>(0.05)    |
| Worked variable schedule                        |                         | 0.07<br>(0.05)    | 0.07<br>(0.05)   |                         | 0.01<br>(0.06)     | 0.01<br>(0.06)    |
| Annual earnings                                 |                         | -0.00<br>(0.00)   | -0.00<br>(0.00)  |                         | 0.00<br>(0.00)     | -0.00<br>(0.00)   |
| Occupation (Professional/executive)             |                         |                   |                  |                         |                    |                   |
| Sales                                           |                         | 0.05<br>(0.08)    | 0.05<br>(0.08)   |                         | -0.05<br>(0.08)    | -0.06<br>(0.08)   |
| Administrative                                  |                         | 0.04<br>(0.06)    | 0.02<br>(0.06)   |                         | 0.03<br>(0.06)     | 0.01<br>(0.06)    |
| Machine operators/<br>Laborers                  |                         | 0.07<br>(0.10)    | 0.08<br>(0.10)   |                         | 0.19<br>(0.13)     | 0.21<br>(0.13)    |
| Service                                         |                         | 0.08<br>(0.06)    | 0.05<br>(0.06)   |                         | 0.08<br>(0.07)     | 0.05<br>(0.07)    |
| Maternal parenting stress                       |                         |                   | 0.12<br>(0.02)   | ***                     |                    | 0.12<br>(0.02)    |
| Maternal depressive symptoms                    |                         |                   | 0.07<br>(0.02)   | ***                     |                    | 0.09<br>(0.02)    |
| Constant                                        | 0.77<br>(0.45)          | 0.75<br>(0.46)    | 0.87<br>(0.45)   | + -0.46<br>(0.50)       | -0.48<br>(0.50)    | -0.34<br>(0.49)   |
| R <sup>2</sup>                                  | 0.34                    | 0.34              | 0.36             | 0.25                    | 0.26               | 0.28              |

Notes: N=2429. Coefficients are shown with robust standard errors in parentheses. All control variables listed in Table 1 were included in the models. Outcome variables, maternal parenting stress, and maternal depressive symptoms were standardized. Results are unweighted. a indicates coefficient differs from "High inflexibility" at  $p<.05$ ; a+ indicates coefficient differs from "High inflexibility" at  $p<.10$ . \*\*\* $p<.001$ ; \*\* $p<.01$ ; \* $p<.05$ ; + $p<.10$

Table A4. *Sensitivity analyses using outcome measure of observer-rated positive child behaviors*

| Model<br>Variable (reference group)             | Observer-Rated Positive Behaviors |   |
|-------------------------------------------------|-----------------------------------|---|
|                                                 | 2<br>B (SE)                       |   |
| Work schedule inflexibility (Low inflexibility) |                                   |   |
| Moderate inflexibility                          | -0.06<br>(0.06)                   |   |
| High inflexibility                              | -0.06<br>(0.09)                   |   |
| Constant                                        | 1.39<br>(0.77)                    | + |

*Notes:*  $N=1067$ . Coefficients are shown with robust standard errors in parentheses. Models include all control variables listed in Table 1, other maternal employment characteristics, and mother-reported externalizing behaviors at the 3-year wave. Outcome variable was standardized. Results are unweighted.  
+ $p<.10$
